# Supplementary figures and images for: Tuberculosis bacillary load, an early marker of disease severity: the utility of tuberculosis Molecular Bacterial Load Assay
Source: PubMed Central journal article supplement — Thorax. 2020 Apr 30;75(7):606–8. doi: 10.1136/thoraxjnl-2019-214238 (PMC7361026; doi:10.1136/thoraxjnl-2019-214238), 2020-04-30

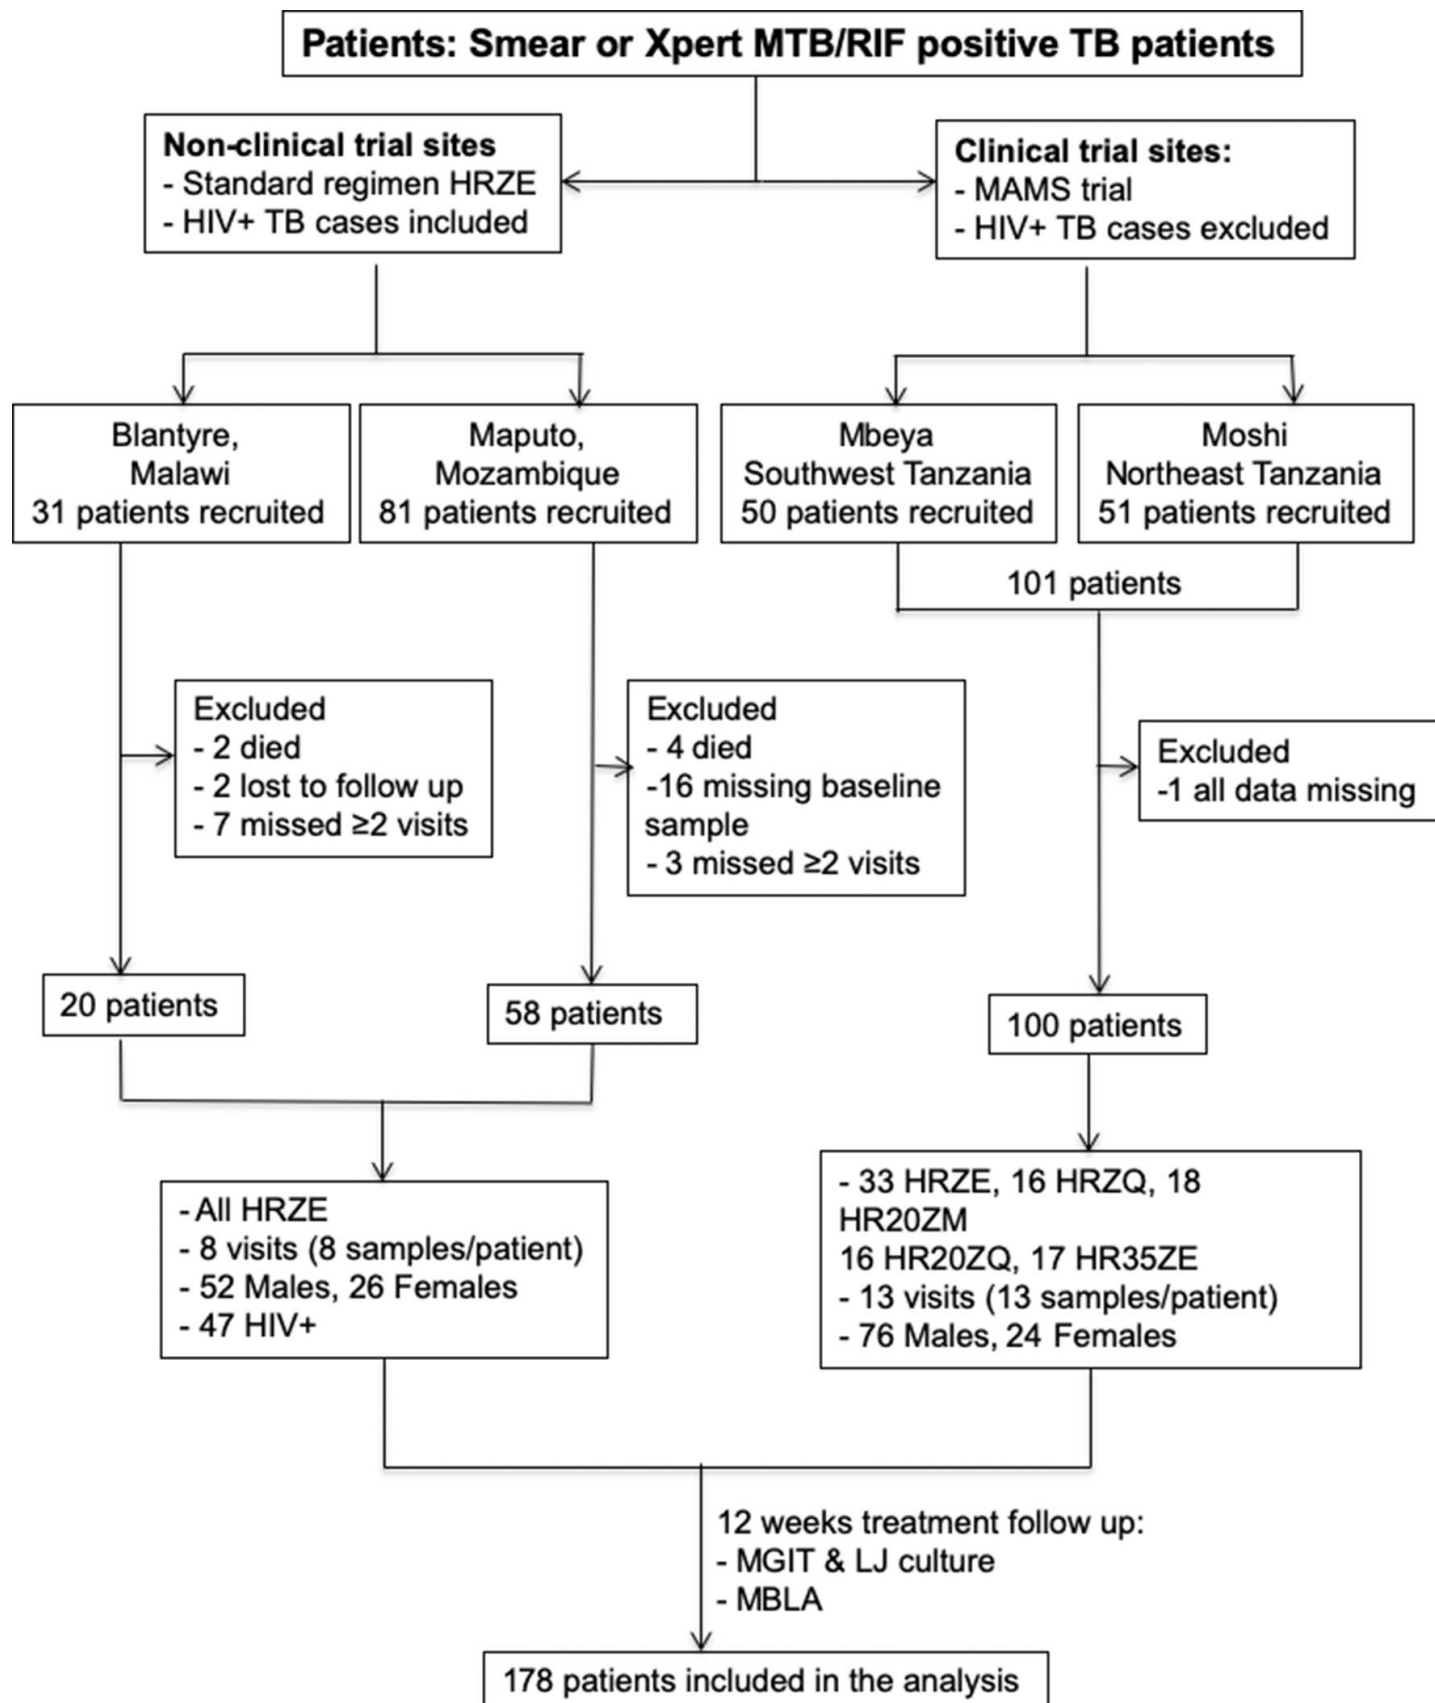

Supplement: thoraxjnl-2019-214238supp001.pdf [file thoraxjnl-2019-214238supp001.pdf]

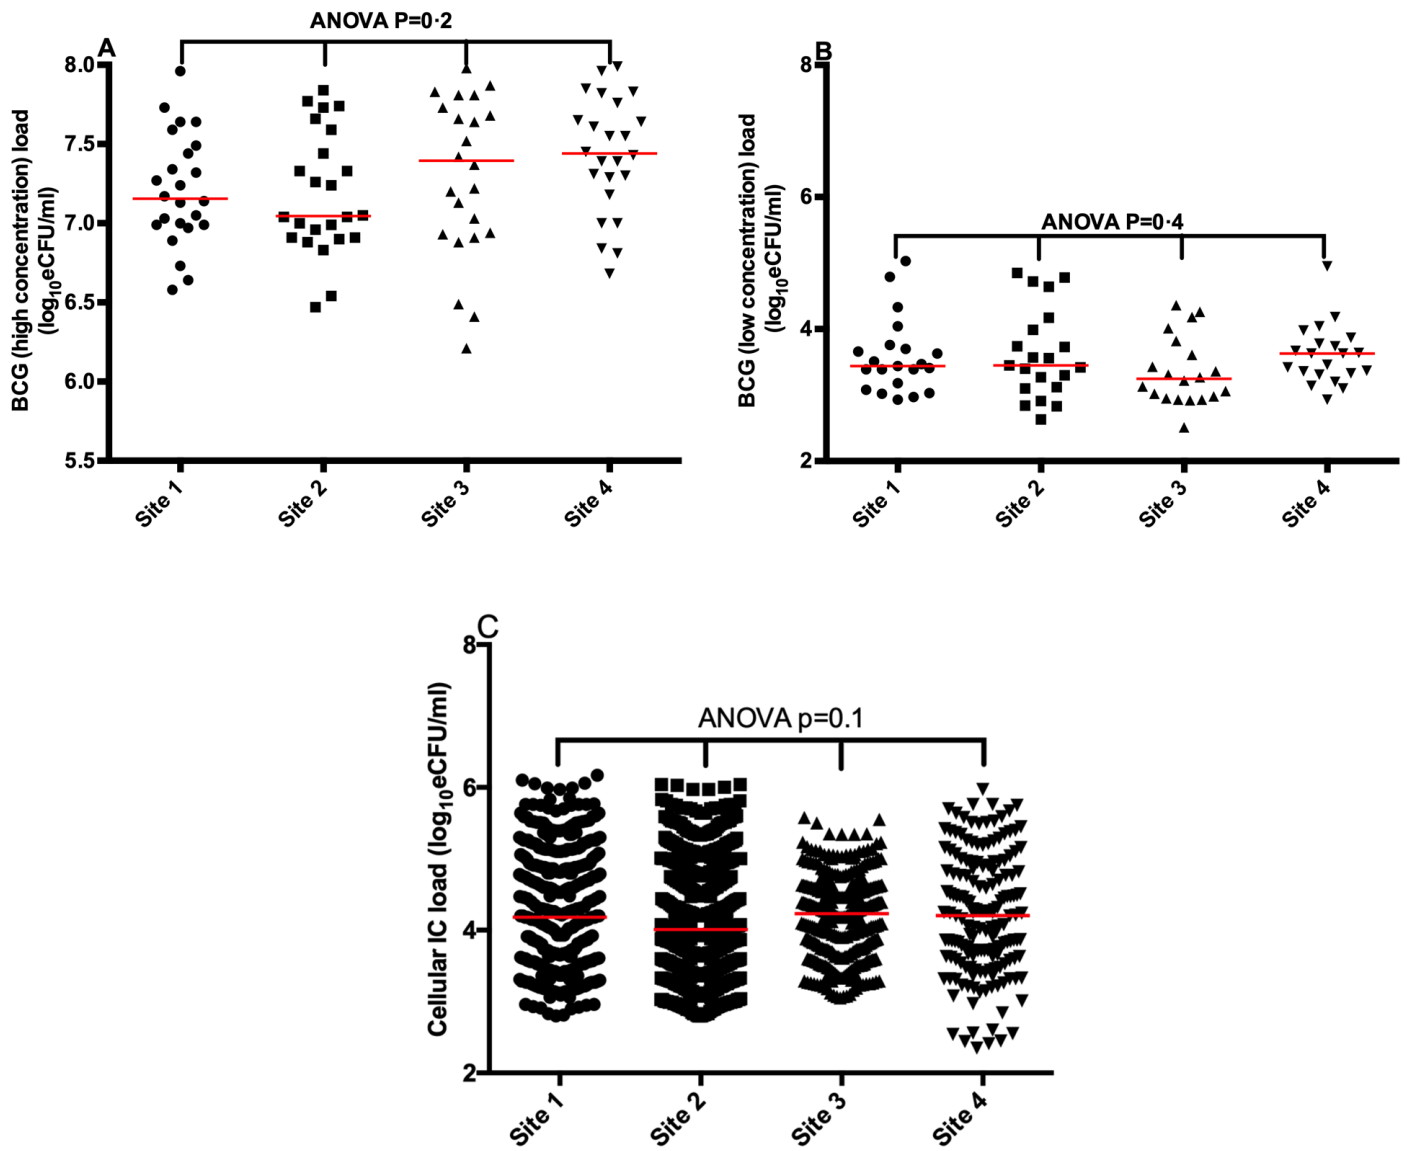

Supplement: thoraxjnl-2019-214238supp002.pdf [file thoraxjnl-2019-214238supp002.pdf]

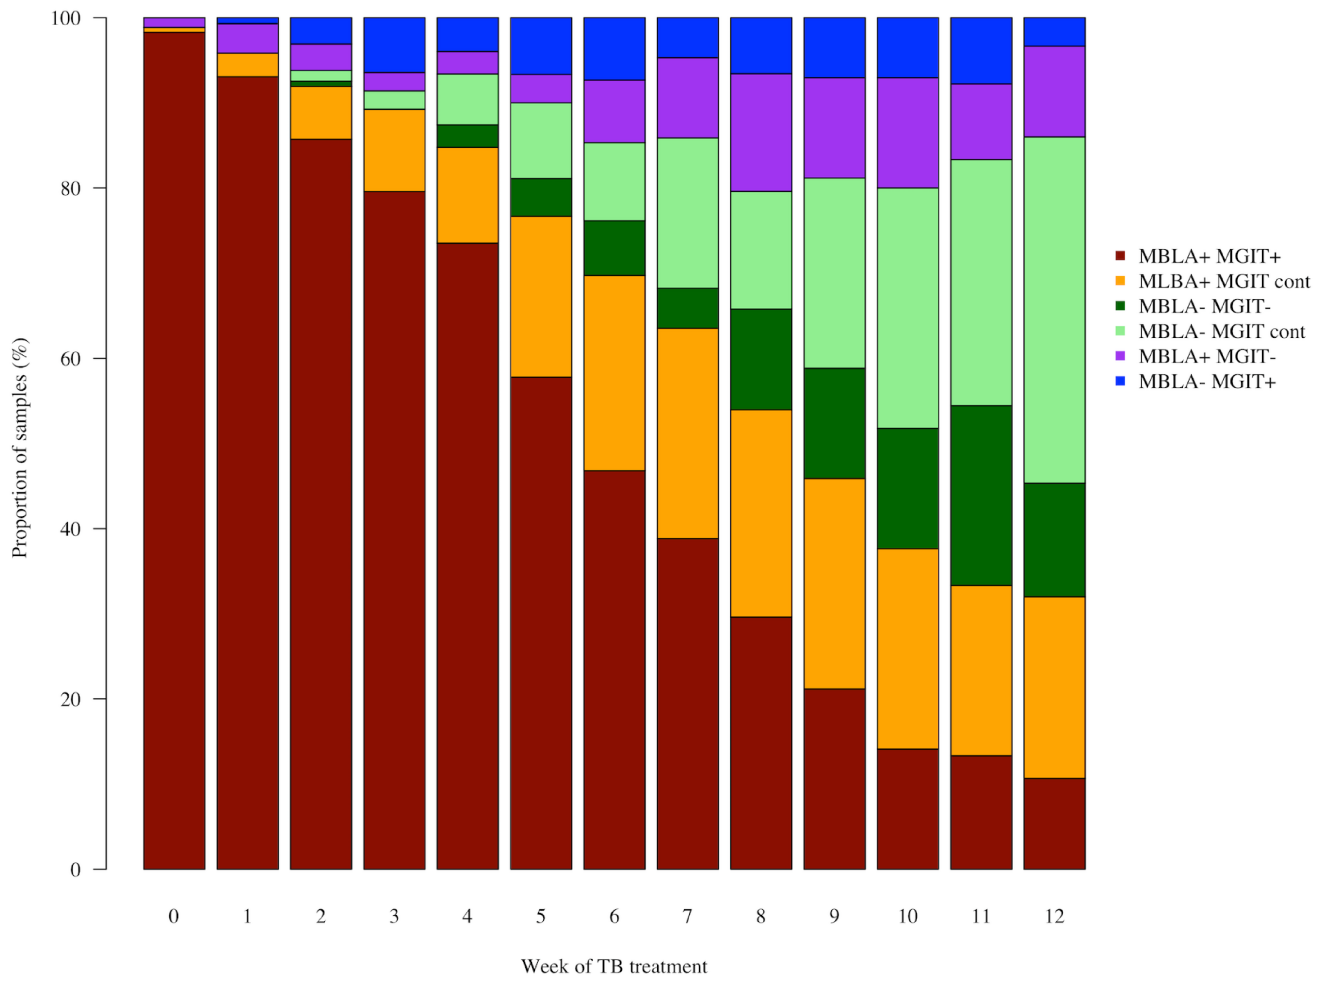

Supplement: thoraxjnl-2019-214238supp003.pdf [file thoraxjnl-2019-214238supp003.pdf]
